# Supplementary material
Source: PubMed Central journal article supplement (PMC7357873)
Supplement: NIHMS1555735-supplement-1.pdf [file NIHMS1555735-supplement-1.pdf]

## Supplemental Tables.

**Supplemental Table 1: Missing transthoracic echocardiographic data.**

| Variable                     | # Missing | Non-missing | Total | % Missing |
|------------------------------|-----------|-------------|-------|-----------|
| <b>LVESVI</b>                | 9         | 991         | 1000  | 0.9       |
| <b>LVEDVI</b>                | 8         | 992         | 1000  | 0.8       |
| <b>LVEF</b>                  | 4         | 996         | 1000  | 0.4       |
| <b>LAVI</b>                  | 9         | 991         | 1000  | 0.9       |
| <b>RAVI</b>                  | 18        | 982         | 1000  | 1.8       |
| <b>LVMI</b>                  | 11        | 989         | 1000  | 1.1       |
| <b>AVA</b>                   | 3         | 997         | 1000  | 0.3       |
| <b>VTI<sub>LVOT</sub></b>    | 8         | 992         | 1000  | 0.8       |
| <b>PASP</b>                  | 192       | 808         | 1000  | 19.2      |
| <b>VTI<sub>RVOT</sub></b>    | 25        | 975         | 1000  | 2.5       |
| <b>RAP</b>                   | 14        | 986         | 1000  | 1.4       |
| <b>WMSI</b>                  | 10        | 990         | 1000  | 1         |
| <b>TRS</b>                   | 1         | 999         | 1000  | 0.1       |
| <b>MRS</b>                   | 0         | 1000        | 1000  | 0         |
| <b>LV Diastolic Function</b> | 62        | 938         | 1000  | 6.2       |

Abbreviations: LAVI = left atrial end-systolic volume index; RAVI = right atrial end-systolic volume index; MRS = severity of mitral regurgitation; PASP= Pulmonary artery systolic pressure; TRS = severity of tricuspid regurgitation; RAP = right atrial pressure; LVEDVI = left ventricular end-diastolic volume index; LVESVI = left ventricular end-systolic volume index; WMSI = wall motion score index; LVMI = left ventricular mass index; VTI<sub>RVOT</sub>= right ventricular outflow tract velocity–time integral; VTI<sub>LVOT</sub> = left ventricular outflow tract velocity–time integral; LVEF = left ventricular ejection fraction; AVA = aortic valve area.

**Supplemental Table 2: Summary of phenogroup assignments across 10 imputed datasets**

| <b>Imputed Dataset</b> | <b>Phenogroup 1<br/>N (%)</b> | <b>Phenogroup 2<br/>N (%)</b> | <b>Phenogroup 3<br/>N (%)</b> | <b>Phenogroup 4<br/>N (%)</b> |
|------------------------|-------------------------------|-------------------------------|-------------------------------|-------------------------------|
| 1                      | 90 (9.0%)                     | 337 (33.7%)                   | 268 (26.8%)                   | 305 (30.5%)                   |
| 2                      | 83 (8.3%)                     | 319 (31.9%)                   | 271 (27.1%)                   | 327 (32.7%)                   |
| 3                      | 119 (11.9%)                   | 238 (23.8%)                   | 175 (17.5%)                   | 468 (46.8%)                   |
| 4                      | 87 (8.7%)                     | 243 (24.3%)                   | 300 (30.0%)                   | 370 (37.0%)                   |
| 5                      | 84 (8.4%)                     | 265 (26.5%)                   | 163 (16.3%)                   | 488 (48.8%)                   |
| 6                      | 121 (12.1%)                   | 238 (23.8%)                   | 181 (18.1%)                   | 460 (46.0%)                   |
| 7                      | 88 (8.8%)                     | 335 (33.5%)                   | 271 (27.1%)                   | 306 (30.6%)                   |
| 8                      | 114 (11.4%)                   | 238 (23.8%)                   | 183 (18.3%)                   | 465 (46.5%)                   |
| 9                      | 85 (8.5%)                     | 315 (31.5%)                   | 282 (28.2%)                   | 318 (31.8%)                   |
| 10                     | 145 (14.5%)                   | 75 (7.5%)                     | 225 (22.5%)                   | 555 (55.5%)                   |
| Consensus              | 85 (8.5%)                     | 314 (31.4%)                   | 205 (20.5%)                   | 396 (39.6%)                   |
